# Supplementary material
Source: publisher site journal article supplement (https://www.dovepress.com/article/549300)
Supplement: Supplementary file 1 [file Supplementary%20Materials_1_1.docx]

# Supplementary Materials

**Table S1.** Distribution of factors in the training set and validation set.

| **No.** | **Training set (n=293)** | **Validation set (n=125)** | **Overall (n=418)** | **Statistics** | ***P*** |
| --- | --- | --- | --- | --- | --- |
| Gender |  |  |  | 0.295 | 0.587 |
| Male | 85(29.0) | 33(26.4) | 118(28.2) |  |  |
| Female | 208(71.0) | 92(73.6) | 300(71.8) |  |  |
| Age (years) | 27.43±10.00 | 27.62±9.27 | 27.49±9.78 | -0.189 | 0.850 |
| Body mass index (BMI) | 21.46±3.51 | 21.34±4.12 | 21.43±3.70 | 0.302 | 0.762 |
| Education level |  |  |  | 2.087 | 0.352 |
| Middle school | 53(18.1) | 24(19.2) | 77(18.4) |  |  |
| Bachelor degree | 184(62.8) | 70(56.0) | 254(60.8) |  |  |
| Master's degree | 56(19.1) | 31(24.8) | 87(20.8) |  |  |
| Age at myopia onset (years) | 11.58±3.06 | 11.62±3.17 | 11.59±3.09 | -0.143 | 0.887 |
| Current diopter (-D) | 7.70±1.91 | 7.62±1.97 | 7.67±1.92 | 0.406 | 0.685 |
| Location where prescription glasses were purchased |  |  |  | 3.999 | 0.135 |
| Eyewear shop | 208(71.0) | 94(75.2) | 302(72.2) |  |  |
| Hospital | 67(22.9) | 29(23.2) | 96(23) |  |  |
| Internet | 18(6.1) | 2(1.6) | 20(4.8) |  |  |
| Timing of eyeglass replacement (years) | 1.50(0.80,3.00) | 1.00(0.65,3.00) | 1.00(0.80,3.00) | -0.418 | 0.676 |
| Daily duration of eyeglass wear (hours/day) | 13.76±2.81 | 14.09±2.90 | 13.86±2.84 | -1.096 | 0.274 |
| Pattern of eyeglass use |  |  |  | 4.484 | 0.214 |
| Always | 288(98.3) | 124(99.2) | 412(98.6) |  |  |
| Occasionally | 3(1.0) | 0(0) | 3(0.7) |  |  |
| Never | 0(0) | 1(0.8) | 1(0.2) |  |  |
| Only when looking at something far | 0(0) | 0(0) | 0(0) |  |  |
| Only in class | 2(0.7) | 0(0) | 2(0.5) |  |  |
| Daily duration of cellphone use (hours/day) | 6.00(3.00,8.00) | 6.00(3.00,8.00) | 6.00(3.00,8.00) | -0.322 | 0.748 |
| Distance at which the cellphone was held from the eyes |  |  |  | 0.426 | 0.808 |
| Do not use cellphone | 15(5.1) | 7(5.6) | 22(5.3) |  |  |
| <33 cm | 188(64.2) | 76(60.8) | 264(63.2) |  |  |
| ≥33 cm | 90(30.7) | 42(33.6) | 132(31.6) |  |  |
| Daily duration of computer use (hours/day) | 2.00(0.00,6.00) | 3.00(0.00,6.00) | 2.00(0.00,6.00) | -0.876 | 0.381 |
| Daily duration of ipad use (hours/day) | 0.00(0.00,1.00) | 0.00(0.00,0.75) | 0.00(0.00,1.00) | -0.056 | 0.956 |
| Daily duration of TV viewing (hours/day) | 0.00(0.00,0.00) | 0.00(0.00,0.00) | 0.00(0.00,0.00) | -0.573 | 0.567 |
| Daily sleep duration (hours/day) | 7.32±1.07 | 7.24±1.18 | 7.30±1.10 | 0.623 | 0.534 |
| Daily duration of reading (hours/day) | 2.00(1.00,6.00) | 2.00(1.00,5.00) | 2.00(1.00,5.25) | -0.672 | 0.501 |
| Reading distance |  |  |  | 1.698 | 0.193 |
| <33 cm | 139(47.4) | 68(54.4) | 207(49.5) |  |  |
| ≥33 cm | 154(52.6) | 57(45.6) | 211(50.5) |  |  |
| Tilted head |  |  |  | 0.044 | 0.834 |
| Yes | 85(29.0) | 35(28.0) | 120(28.7) |  |  |
| No | 208(71.0) | 90(72.0) | 298(71.3) |  |  |
| Distance between fingertip and tip of pen when writing |  |  |  | 0.636 | 0.425 |
| <2 cm | 96(32.8) | 46(36.8) | 142(34.0) |  |  |
| ≥2 cm | 197(67.2) | 79(63.2) | 276(66.0) |  |  |
| Daily duration of continuous reading (hours/day) | 1.00(1.00,2.00) | 1.00(0.88,2.00) | 1.00(1.00,2.00) | -0.768 | 0.442 |
| Daily duration of reading while lying down (hours/day) | 1.00(0.00,2.00) | 1.00(0.00,2.00) | 1.00(0.00,2.00) | -0.346 | 0.729 |
| Method of lighting |  |  |  | 0.991 | 0.609 |
| Desk lamp | 62(21.2) | 26(20.8) | 88(21.1) |  |  |
| Ceiling lamp | 124(42.3) | 59(47.2) | 183(43.8) |  |  |
| Table lamp + ceiling lamp | 107(36.5) | 40(32.0) | 147(35.2) |  |  |
| Desk lamp light source |  |  |  | 1.858 | 0.762 |
| Incandescent lamp | 66(22.5) | 33(26.4) | 99(23.7) |  |  |
| Fluorescent lamp | 11(3.8) | 3(2.4) | 14(3.3) |  |  |
| LED | 123(42.0) | 47(37.6) | 170(40.7) |  |  |
| Unclear | 60(20.5) | 25(20.0) | 85(20.3) |  |  |
| No desk lamp | 33(11.3) | 17(13.6) | 50(12.0) |  |  |
| Daily duration of outdoor activities (hours/ day) | 1.00(0.50,1.00) | 1.00(0.50,1.00) | 1.00(0.50,1.00) | -0.837 | 0.402 |
| Paternal myopia |  |  |  | 0.184 | 0.980 |
| No myopia | 224(76.5) | 96(76.8) | 320(76.6) |  |  |
| Low myopia | 30(10.2) | 12(9.6) | 42(10.0) |  |  |
| Moderate myopia | 25(8.5) | 10(8.0) | 35(8.4) |  |  |
| High myopia | 14(4.8) | 7(5.6) | 21(5.0) |  |  |
| Maternal myopia |  |  |  | 4.806 | 0.187 |
| No myopia | 231(78.8) | 99(79.2) | 330(78.9) |  |  |
| Low myopia | 26(8.9) | 15(12.0) | 41(9.8) |  |  |
| Moderate myopia | 18(6.1) | 2(1.6) | 20(4.8) |  |  |
| High myopia | 18(6.1) | 9(7.2) | 27(6.5) |  |  |
| Familial myopia |  |  |  | 0.896 | 0.826 |
| No myopia | 134(45.7) | 61(48.8) | 195(46.7) |  |  |
| Low myopia | 32(10.9) | 12(9.6) | 44(10.5) |  |  |
| Moderate myopia | 90(30.7) | 34(27.2) | 124(29.7) |  |  |
| High myopia | 37(12.6) | 18(14.4) | 55(13.2) |  |  |
| Spherical equivalent  (-D) | 8.60±2.09 | 8.56±2.32 | 8.59±2.16 | 0.186 | 0.852 |
| Axial length (mm)* | 26.83±1.20 | 26.77±1.23 | 26.81±1.21 | 0.478 | 0.633 |
| Anterior chamber depth (mm)* | 3.64±0.25 | 3.67±0.28 | 3.65±0.26 | -1.292 | 0.197 |
| White-to-white distance (mm)* | 11.81±0.71 | 11.89±0.37 | 11.84±0.63 | -1.184 | 0.237 |
| Pupil diameter(mm)* | 3.90(3.40,4.30) | 3.90(3.50,4.40) | 3.90(3.40,4.40) | -1.443 | 0.149 |
| Keratometry* | 43.86±1.58 | 43.90±1.67 | 43.87±1.61 | -0.259 | 0.796 |
| Corneal thickness (μm)# | 543.62±30.17 | 546.92±30.28 | 544.61±30.21 | -1.022 | 0.307 |
| Anterior chamber depth (mm)# | 3.14±0.28 | 3.16±0.31 | 3.15±0.29 | -0.448 | 0.654 |
| Anterior chamber volume (mm3)# | 173.58±33.83 | 175.47±28.28 | 174.15±32.25 | -0.549 | 0.583 |
| Pupil diameter (mm)# | 3.71(3.25,4.24) | 3.74(3.29,4.38) | 3.71(3.25,4.27) | -0.920 | 0.358 |
| Lens thickness (μm)# | 3.89±0.36 | 3.86±0.36 | 3.88±0.36 | 0.943 | 0.346 |
| Keratometry# | 43.64±1.86 | 43.76±1.4 | 43.67±1.74 | -0.651 | 0.515 |
| Optic disc area (mm2) | 2.35±0.84 | 2.22±0.65 | 2.31±0.79 | 1.673 | 0.095 |
| PPA area (mm2) | 3.32±1.99 | 2.91±1.69 | 3.20±1.92 | 2.028 | 0.043 |
| Maximum width of PPA (μm) | 1082.68±505.46 | 977.88±522.22 | 1051.34±512.16 | 1.922 | 0.055 |
| Extent of PPA |  |  |  | 0.377 | 0.539 |
| ≤180° | 224(76.5) | 99(79.2) | 323(77.3) |  |  |
| >180° | 69(23.5) | 26(20.8) | 95(22.7) |  |  |
| Horizontal disc diameter (μm) | 1420.75±353.67 | 1387.38±309.96 | 1410.78±341.16 | 0.915 | 0.361 |
| Vertical disc diameter (μm) | 1851.56±312.98 | 1786.70±259.53 | 1832.17±299.18 | 2.037 | 0.042 |
| Shortest disc diameter (μm) | 1382.29±335.21 | 1354.74±291.55 | 1374.05±322.68 | 0.799 | 0.425 |
| Longest disc diameter (μm) | 1929.70±319.82 | 1852.66±260.78 | 1906.66±305.11 | 2.376 | 0.018 |
| Distance from macula to papilla (μm) | 5633.86±561.06 | 5605.43±768.78 | 5625.36±629.56 | 0.422 | 0.673 |
| Optic disc tilt |  |  |  | 1.370 | 0.242 |
| Tilt | 231(78.8) | 92(73.6) | 323(77.3) |  |  |
| No tilt | 62(21.2) | 33(26.4) | 95(22.7) |  |  |
| Optic disc tilt ratio | 0.71±0.11 | 0.73±0.12 | 0.72±0.12 | -1.349 | 0.178 |
| Disc rotation angle | 15.49(6.62,24.73) | 14.90(7.31,24.66) | 15.38(6.93,24.72) | -0.088 | 0.930 |
| Group |  |  |  | 0.547 | 0.459 |
| PM | 187(63.8) | 75(60.0) | 262(62.7) |  |  |
| Non-PM | 106(36.2) | 50(40.0) | 156(37.3) |  |  |

Note: * indicates IOL-Master measurement; # indicates Pentacam measurement; PPA: peripapillary atrophy area; disc tilt ratio: defined as the ratio of the shortest to the longest disc diameter, with a ratio ≤0.8 considered disc tilt; disc torsion angle: defined as the degree of deviation of the long axis of the optic disc from the vertical line of the horizontal line connecting the macular fovea to the center of the optic disc ; PM: pathological myopia; non-PM: non-pathological myopia.

**Table S2.** Differences in the distribution of factors for pathologic myopia and non-pathologic myopia in the training set.

| **No.** | **Non-PM (n=106)** | **PM (n=187)** | **Training set (n=293)** | **Statistics** | ***P*** |
| --- | --- | --- | --- | --- | --- |
| Gender |  |  |  | 0.220 | 0.639 |
| Male | 29(27.4) | 56(29.9) | 85(29.0) |  |  |
| Female | 77(72.6) | 131(70.1) | 208(71.0) |  |  |
| Age (years) | 25.62±9.87 | 28.45±9.96 | 27.43±10.00 | -2.342 | 0.020 |
| Body mass index (BMI) | 20.66±3.11 | 21.92±3.65 | 21.46±3.51 | -2.987 | 0.003 |
| Education level |  |  |  | 6.845 | 0.033 |
| Middle school | 26(24.5) | 27(14.4) | 53(18.1) |  |  |
| Bachelor degree | 66(62.3) | 118(63.1) | 184(62.8) |  |  |
| Master's degree | 14(13.2) | 42(22.5) | 56(19.1) |  |  |
| Age at myopia onset (years) | 11.25±2.87 | 11.76±3.16 | 11.58±3.06 | -1.358 | 0.176 |
| Current diopter (-D) | 7.12±1.37 | 8.03±2.08 | 7.70±1.91 | -4.037 | <0.001 |
| Location where prescription glasses were purchased |  |  |  | 0.545 | 0.762 |
| Eyewear shop | 78(73.6) | 130(69.5) | 208(71) |  |  |
| Hospital | 22(20.8) | 45(24.1) | 67(22.9) |  |  |
| Internet | 6(5.7) | 12(6.4) | 18(6.1) |  |  |
| Timing of eyeglass replacement (years) | 1.50(0.50,3.00) | 1.50(1.00,2.00) | 1.50(0.80,3.00) | -0.235 | 0.814 |
| Daily duration of eyeglass wear (hours/day) | 13.60±2.57 | 13.84±2.94 | 13.76±2.81 | -0.698 | 0.243 |
| Pattern of eyeglass use |  |  |  | 4.808 | 0.090 |
| Always | 102(96.2) | 186(99.5) | 288(98.3) |  |  |
| Occasionally | 2(1.9) | 1(0.5) | 3(1.0) |  |  |
| Never | 0(0) | 0(0) | 0(0) |  |  |
| Only when looking at something far | 0(0) | 0(0) | 0(0) |  |  |
| Only in class | 2(1.9) | 0(0) | 2(0.7) |  |  |
| Daily duration of cellphone use (hours/day) | 6.00(3.00,8.00) | 6.00(3.00,9.00) | 6.00(3.00,8.00) | -1.165 | 0.244 |
| Distance at which the cellphone was held from the eyes |  |  |  | 2.021 | 0.364 |
| Do not use cellphone | 8(7.5) | 7(3.7) | 15(5.1) |  |  |
| <33 cm | 66(62.3) | 122(65.2) | 188(64.2) |  |  |
| ≥33 cm | 32(30.2) | 58(31.0) | 90(30.7) |  |  |
| Daily duration of computer use (hours/day) | 2.00(0.00,6.00) | 2.00(0.00,7.00) | 2.00(0.00,6.00) | -1.249 | 0.212 |
| Daily duration of iPad use (hours/day) | 0.00(0.00,0.00) | 0.00(0.00,1.00) | 0.00(0.00,1.00) | -1.566 | 0.117 |
| Daily duration of TV viewing (hours/day) | 0.00(0.00,0.00) | 0.00(0.00,0.00) | 0.00(0.00,0.00) | -0.835 | 0.404 |
| Daily sleep duration (hours/day) | 7.46±1.14 | 7.24±1.02 | 7.32±1.07 | 1.694 | 0.046 |
| Daily duration of reading (hours/day) | 2.00(1.00,6.00) | 2.00(1.00,5.00) | 2.00(1.00,6.00) | -1.378 | 0.168 |
| Reading distance |  |  |  | 0.310 | 0.578 |
| <33 cm | 48(45.3) | 91(48.7) | 139(47.4) |  |  |
| ≥33 cm | 58(54.7) | 96(51.3) | 154(52.6) |  |  |
| Tilted head |  |  |  | 6.140 | 0.013 |
| Yes | 40(37.7) | 45(24.1) | 85(29.0) |  |  |
| No | 66(62.3) | 142(75.9) | 208(71.0) |  |  |
| Distance between fingertip and tip of pen when writing |  |  |  | 0.005 | 0.944 |
| <2 cm | 35(33.0) | 61(32.6) | 96(32.8) |  |  |
| ≥2 cm | 71(67.0) | 126(67.4) | 197(67.2) |  |  |
| Daily duration of continuous reading (hours/day) | 1.00(1.00,2.00) | 1.00(1.00,2.00) | 1.00(1.00,2.00) | -0.160 | 0.873 |
| Daily duration of reading while lying down (hours/day) | 2.00(0.50,3.00) | 1.00(0.00,2.00) | 1.00(0.00,2.00) | -2.448 | 0.014 |
| Method of lighting |  |  |  | 1.414 | 0.493 |
| Desk lamp | 26(24.5) | 36(19.3) | 62(21.2) |  |  |
| Ceiling lamp | 41(38.7) | 83(44.4) | 124(42.3) |  |  |
| Table lamp + ceiling lamp | 39(36.8) | 68(36.4) | 107(36.5) |  |  |
| Desk lamp light source |  |  |  | 6.379 | 0.173 |
| Incandescent lamp | 18(17.0) | 48(25.7) | 66(22.5) |  |  |
| Fluorescent lamp | 2(1.9) | 9(4.8) | 11(3.8) |  |  |
| LED | 45(42.5) | 78(41.7) | 123(42.0) |  |  |
| Unclear | 26(24.5) | 34(18.2) | 60(20.5) |  |  |
| No desk lamp | 15(14.2) | 18(9.6) | 33(11.3) |  |  |
| Daily duration of outdoor activities (hours/ day) | 1.00(0.50,1.00) | 1.00(0.50,1.00) | 1.00(0.50,1.00) | -1.925 | 0.054 |
| Paternal myopia |  |  |  | 0.876 | 0.831 |
| No myopia | 80(75.5) | 144(77.0) | 224(76.5) |  |  |
| Low myopia | 13(12.3) | 17(9.1) | 30(10.2) |  |  |
| Moderate myopia | 8(7.5) | 17(9.1) | 25(8.5) |  |  |
| High myopia | 5(4.7) | 9(4.8) | 14(4.8) |  |  |
| Maternal myopia |  |  |  | 1.163 | 0.762 |
| No myopia | 87(82.1) | 144(77.0) | 231(78.8) |  |  |
| Low myopia | 8(7.5) | 18(9.6) | 26(8.9) |  |  |
| Moderate myopia | 5(4.7) | 13(7.0) | 18(6.1) |  |  |
| High myopia | 6(5.7) | 12(6.4) | 18(6.1) |  |  |
| Familial myopia |  |  |  | 1.797 | 0.616 |
| No myopia | 52(49.1) | 82(43.9) | 134(45.7) |  |  |
| Low myopia | 11(10.4) | 21(11.2) | 32(10.9) |  |  |
| Moderate myopia | 33(31.1) | 57(30.5) | 90(30.7) |  |  |
| High myopia | 10(9.4) | 27(14.4) | 37(12.6) |  |  |
| Spherical equivalent  (-D) | 7.87±1.62 | 9.02±2.21 | 8.60±2.09 | -5.063 | <0.001 |
| Axial length (mm)* | 26.12±0.91 | 27.23±1.16 | 26.83±1.20 | -9.010 | <0.001 |
| Anterior chamber depth (mm)* | 3.61±0.22 | 3.65±0.27 | 3.64±0.25 | -1.572 | 0.117 |
| White-to-white distance (mm)* | 11.79±0.42 | 11.83±0.83 | 11.81±0.71 | -0.491 | 0.624 |
| Pupil diameter (mm)* | 3.80(3.40,4.43) | 3.90(3.40,4.30) | 3.90(3.40,4.30) | -0.535 | 0.593 |
| Keratometry* | 44.40±1.46 | 43.55±1.57 | 43.86±1.58 | 4.571 | <0.001 |
| Corneal thickness (μm)# | 539.53±32.99 | 545.94±28.28 | 543.62±30.17 | -1.754 | 0.080 |
| Anterior chamber depth (mm)# | 3.11±0.24 | 3.16±0.29 | 3.14±0.28 | -1.620 | 0.106 |
| Anterior chamber volume (mm3)# | 167.99±32.33 | 176.75±34.33 | 173.58±33.83 | -2.143 | 0.033 |
| Pupil diameter (mm)# | 3.79(3.31,4.48) | 3.68(3.16,4.20) | 3.71(3.25,4.24) | -1.609 | 0.108 |
| Lens thickness (μm)# | 3.84±0.35 | 3.92±0.37 | 3.89±0.36 | -1.754 | 0.080 |
| Keratometry# | 44.00±2.29 | 43.43±1.54 | 43.64±1.86 | 2.553 | 0.011 |
| Optic disc area (mm2) | 2.39±0.75 | 2.32±0.89 | 2.35±0.84 | 0.670 | 0.504 |
| PPA area (mm2) | 2.63±1.14 | 3.71±2.26 | 3.32±1.99 | -5.440 | <0.001 |
| Maximum width of PPA (μm) | 885.20±353.49 | 1194.62±543.81 | 1082.68±505.46 | -5.889 | <0.001 |
| Extent of PPA |  |  |  | 13.795 | <0.001 |
| ≤180° | 94(88.7) | 130(69.5) | 224(76.5) |  |  |
| >180° | 12(11.3) | 57(30.5) | 69(23.5) |  |  |
| Horizontal disc diameter (μm) | 1454.90±289.94 | 1401.40±384.54 | 1420.75±353.67 | 1.344 | 0.180 |
| Vertical disc diameter (μm) | 1856.22±249.96 | 1848.93±344.23 | 1851.56±312.98 | 0.209 | 0.835 |
| Shortest disc diameter (μm) | 1425.62±275.48 | 1357.72±363.16 | 1382.29±335.21 | 1.801 | 0.073 |
| Longest disc diameter (μm) | 1911.35±261.11 | 1940.10±348.98 | 1929.70±319.82 | -0.799 | 0.425 |
| Distance from macula to papilla (μm) | 5560.10±643.18 | 5675.66±505.77 | 5633.86±561.06 | -1.700 | 0.09 |
| Optic disc tilt |  |  |  | 2.749 | 0.097 |
| Tilt | 78(73.6) | 153(81.8) | 231(78.8) |  |  |
| No tilt | 28(26.4) | 34(18.2) | 62(21.2) |  |  |
| Optic disc tilt ratio | 0.75±0.11 | 0.70±0.12 | 0.71±0.11 | 3.777 | <0.001 |
| Disc rotation angle | 15.45(6.20,24.71) | 15.73(6.91,25.42) | 15.49(6.62,24.73) | -0.499 | 0.618 |

Note: * indicates IOL-Master measurement; # indicates Pentacam measurement; PPA: peripapillary atrophy area; disc tilt ratio: defined as the ratio of the shortest to the longest disc diameter, with a ratio ≤0.8 considered disc tilt; disc torsion angle: defined as the degree of deviation of the long axis of the optic disc from the vertical line of the horizontal line connecting the macular fovea to the center of the optic disc ; PM: pathological myopia ; non-PM: non-pathological myopia.


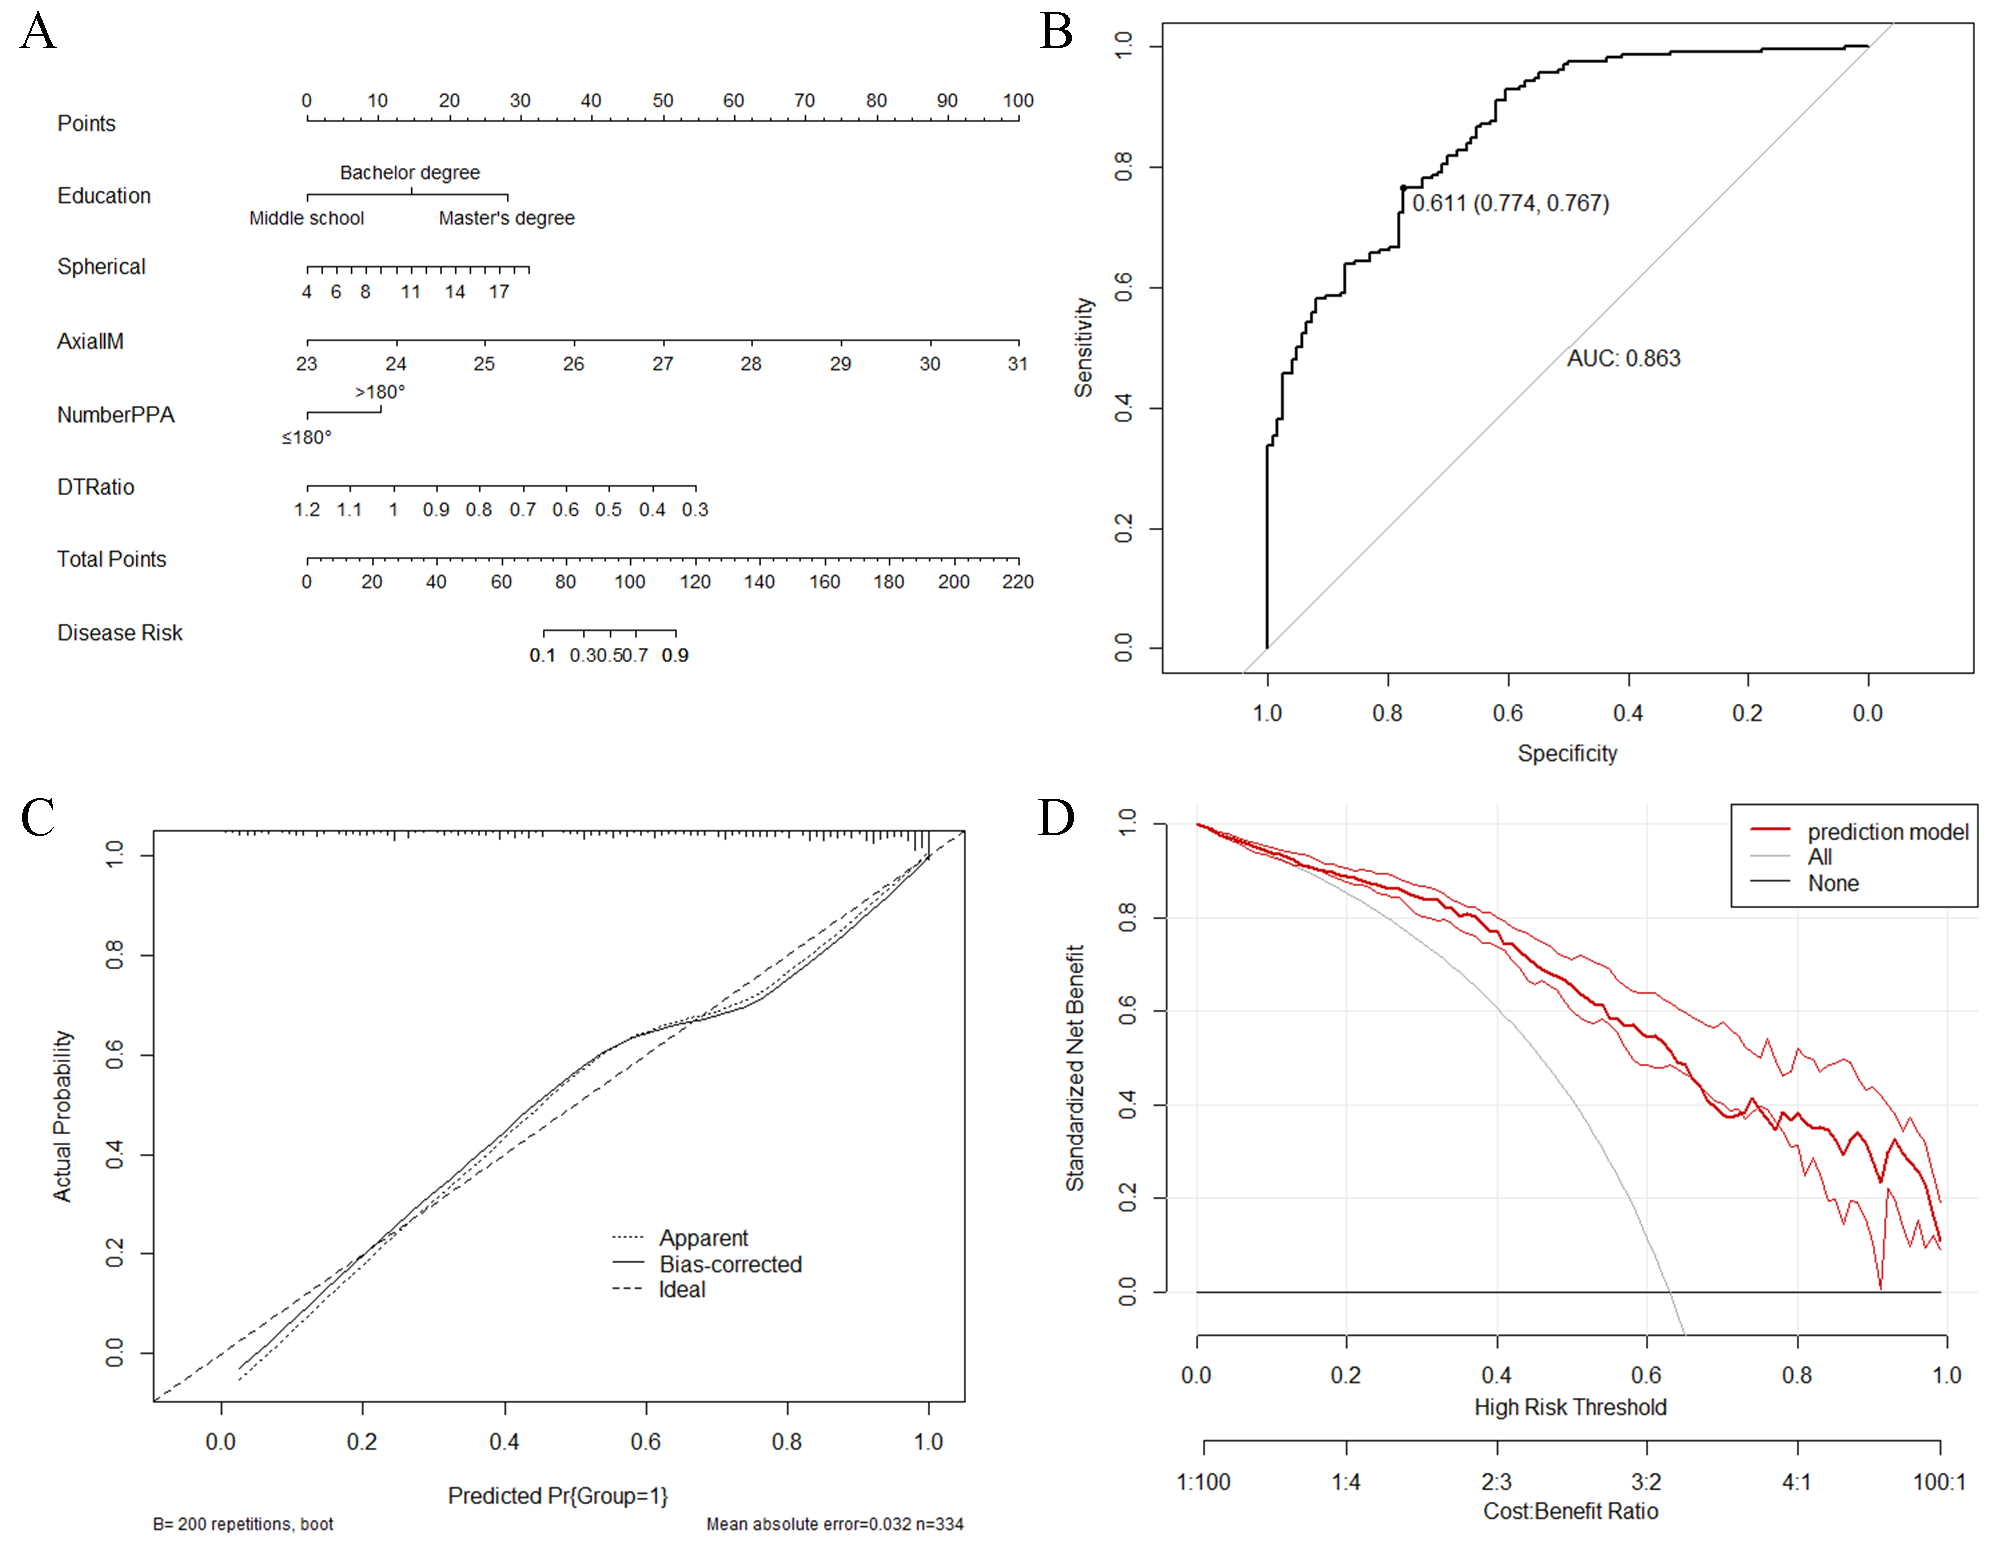


**Figure S1.** (A) Diagnostic nomogram for predicting pathologic myopia in patients with tessellated fundus (8:2 split) (Note: Education - education level; Spherical - spherical equivalent (-D); AxialIM - axial length (mm); NumberPPA - extent of peripapillary atrophy; DTRatio - optic disc tilt ratio.); (B) Receiver operating characteristic curve (ROC) of nomogram for predicting pathologic myopia in the training set (8:2 split); (C) Calibration curve of nomogram for predicting pathologic myopia in the training set (8:2 split); (D) Decision curve analysis (DCA) of nomogram for predicting pathologic myopia in the training set (8:2 split)

**
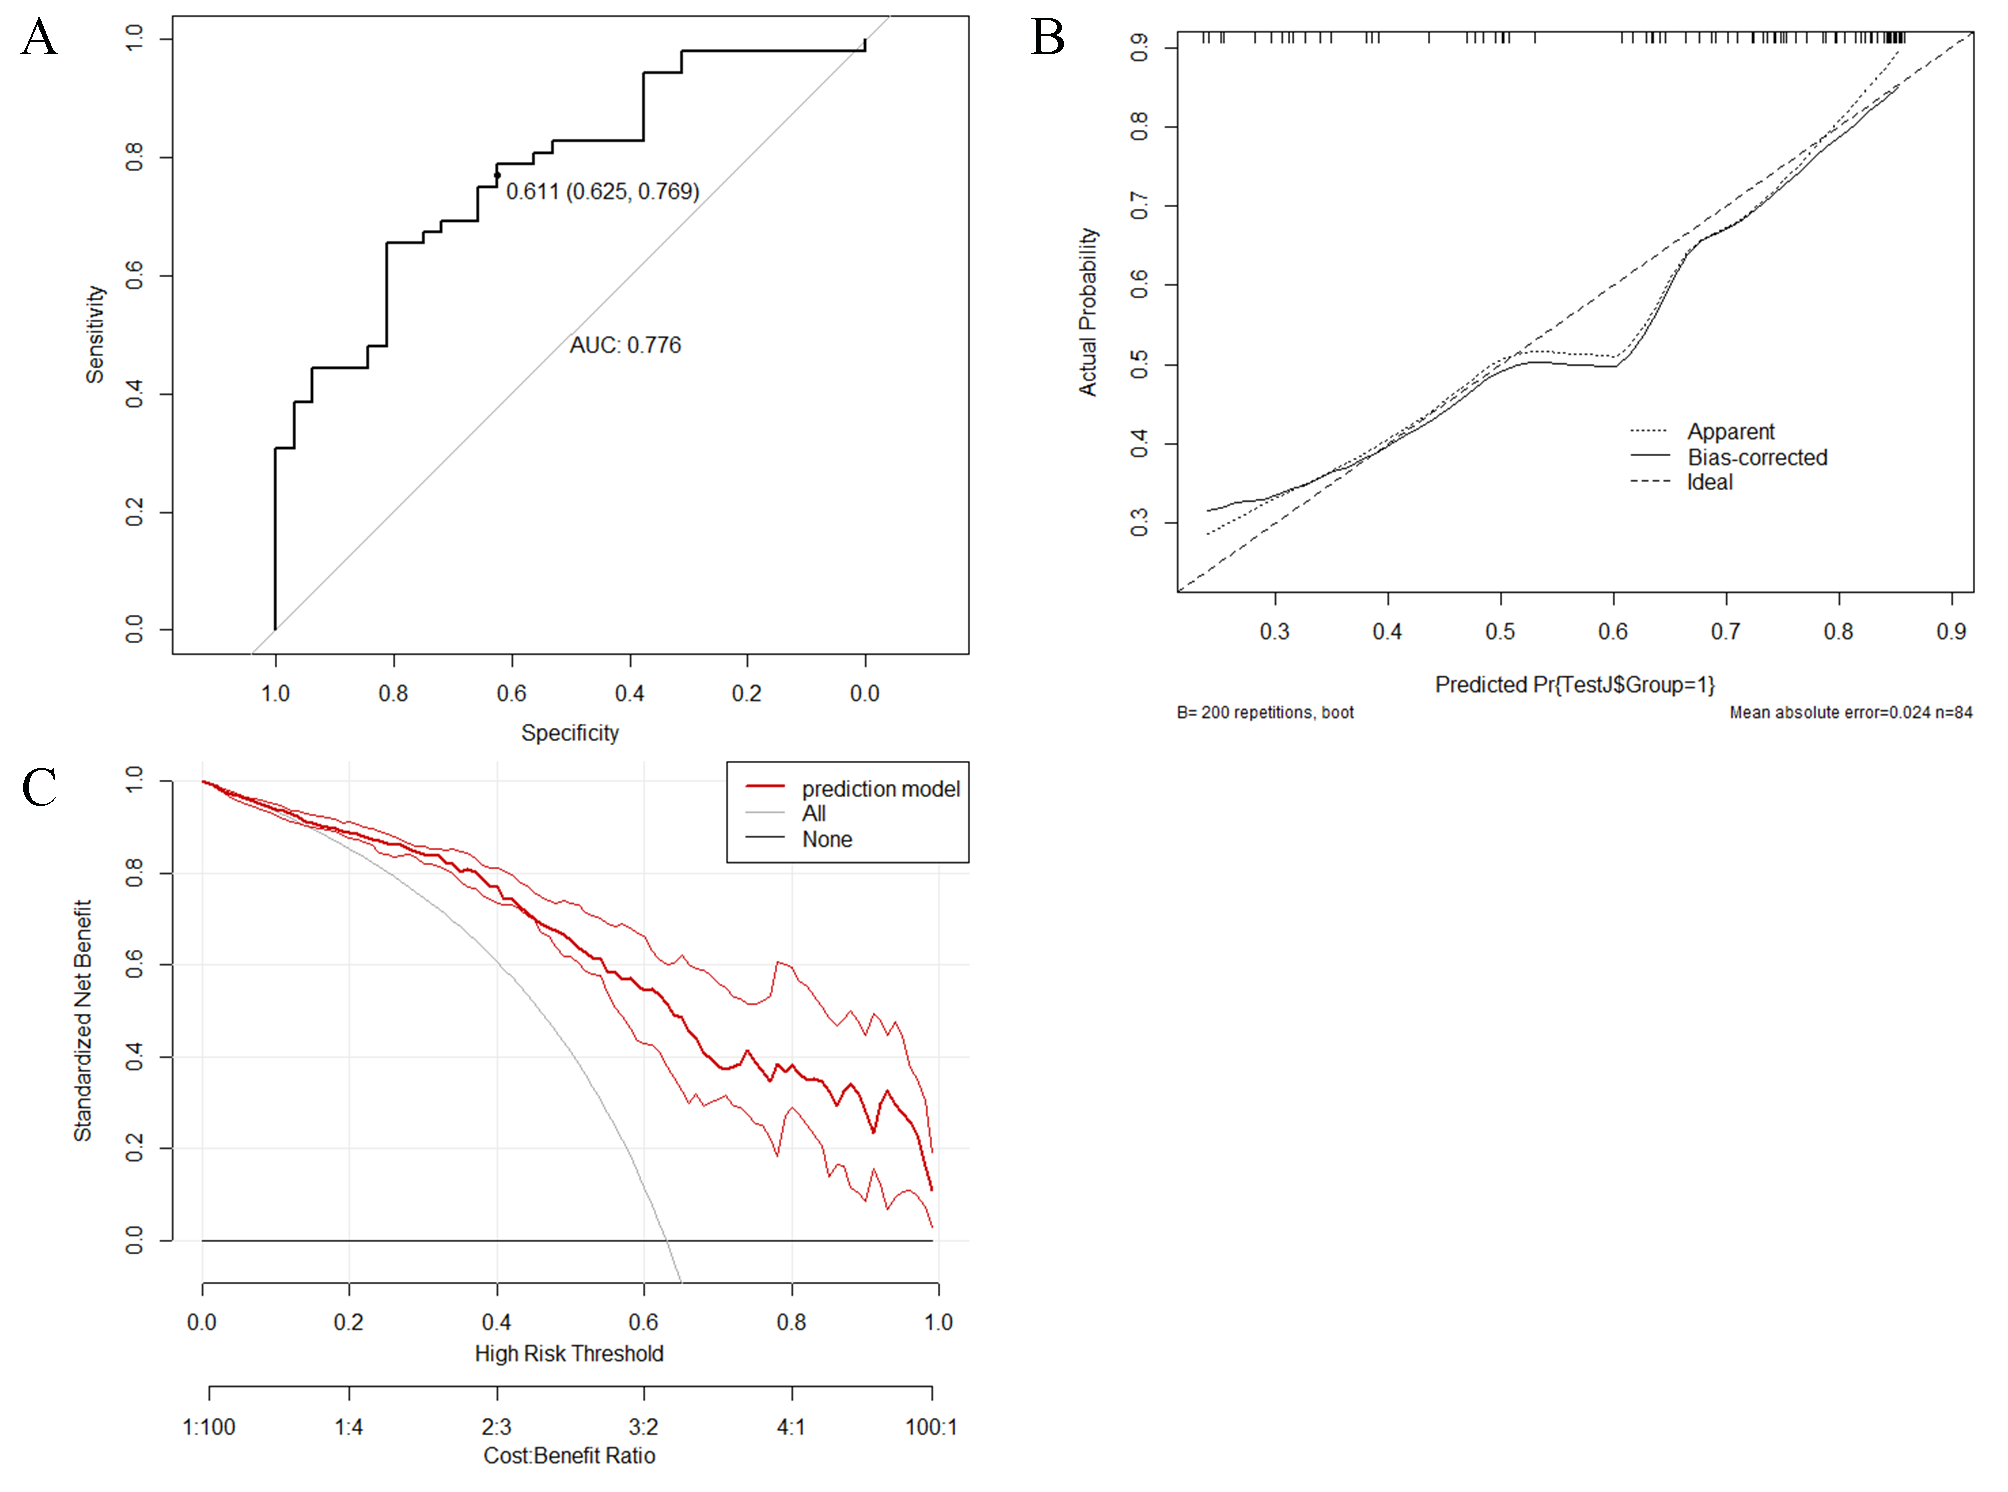
**

**Figure S2**. (A) Receiver operating characteristic curve (ROC) of nomogram for predicting pathologic myopia in the validation set (8:2 split); (B) Calibration curve of nomogram for predicting pathologic myopia in the validation set (8:2 split); (C) Decision curve analysis (DCA) of nomogram for predicting pathologic myopia in the validation set (8:2 split)

**
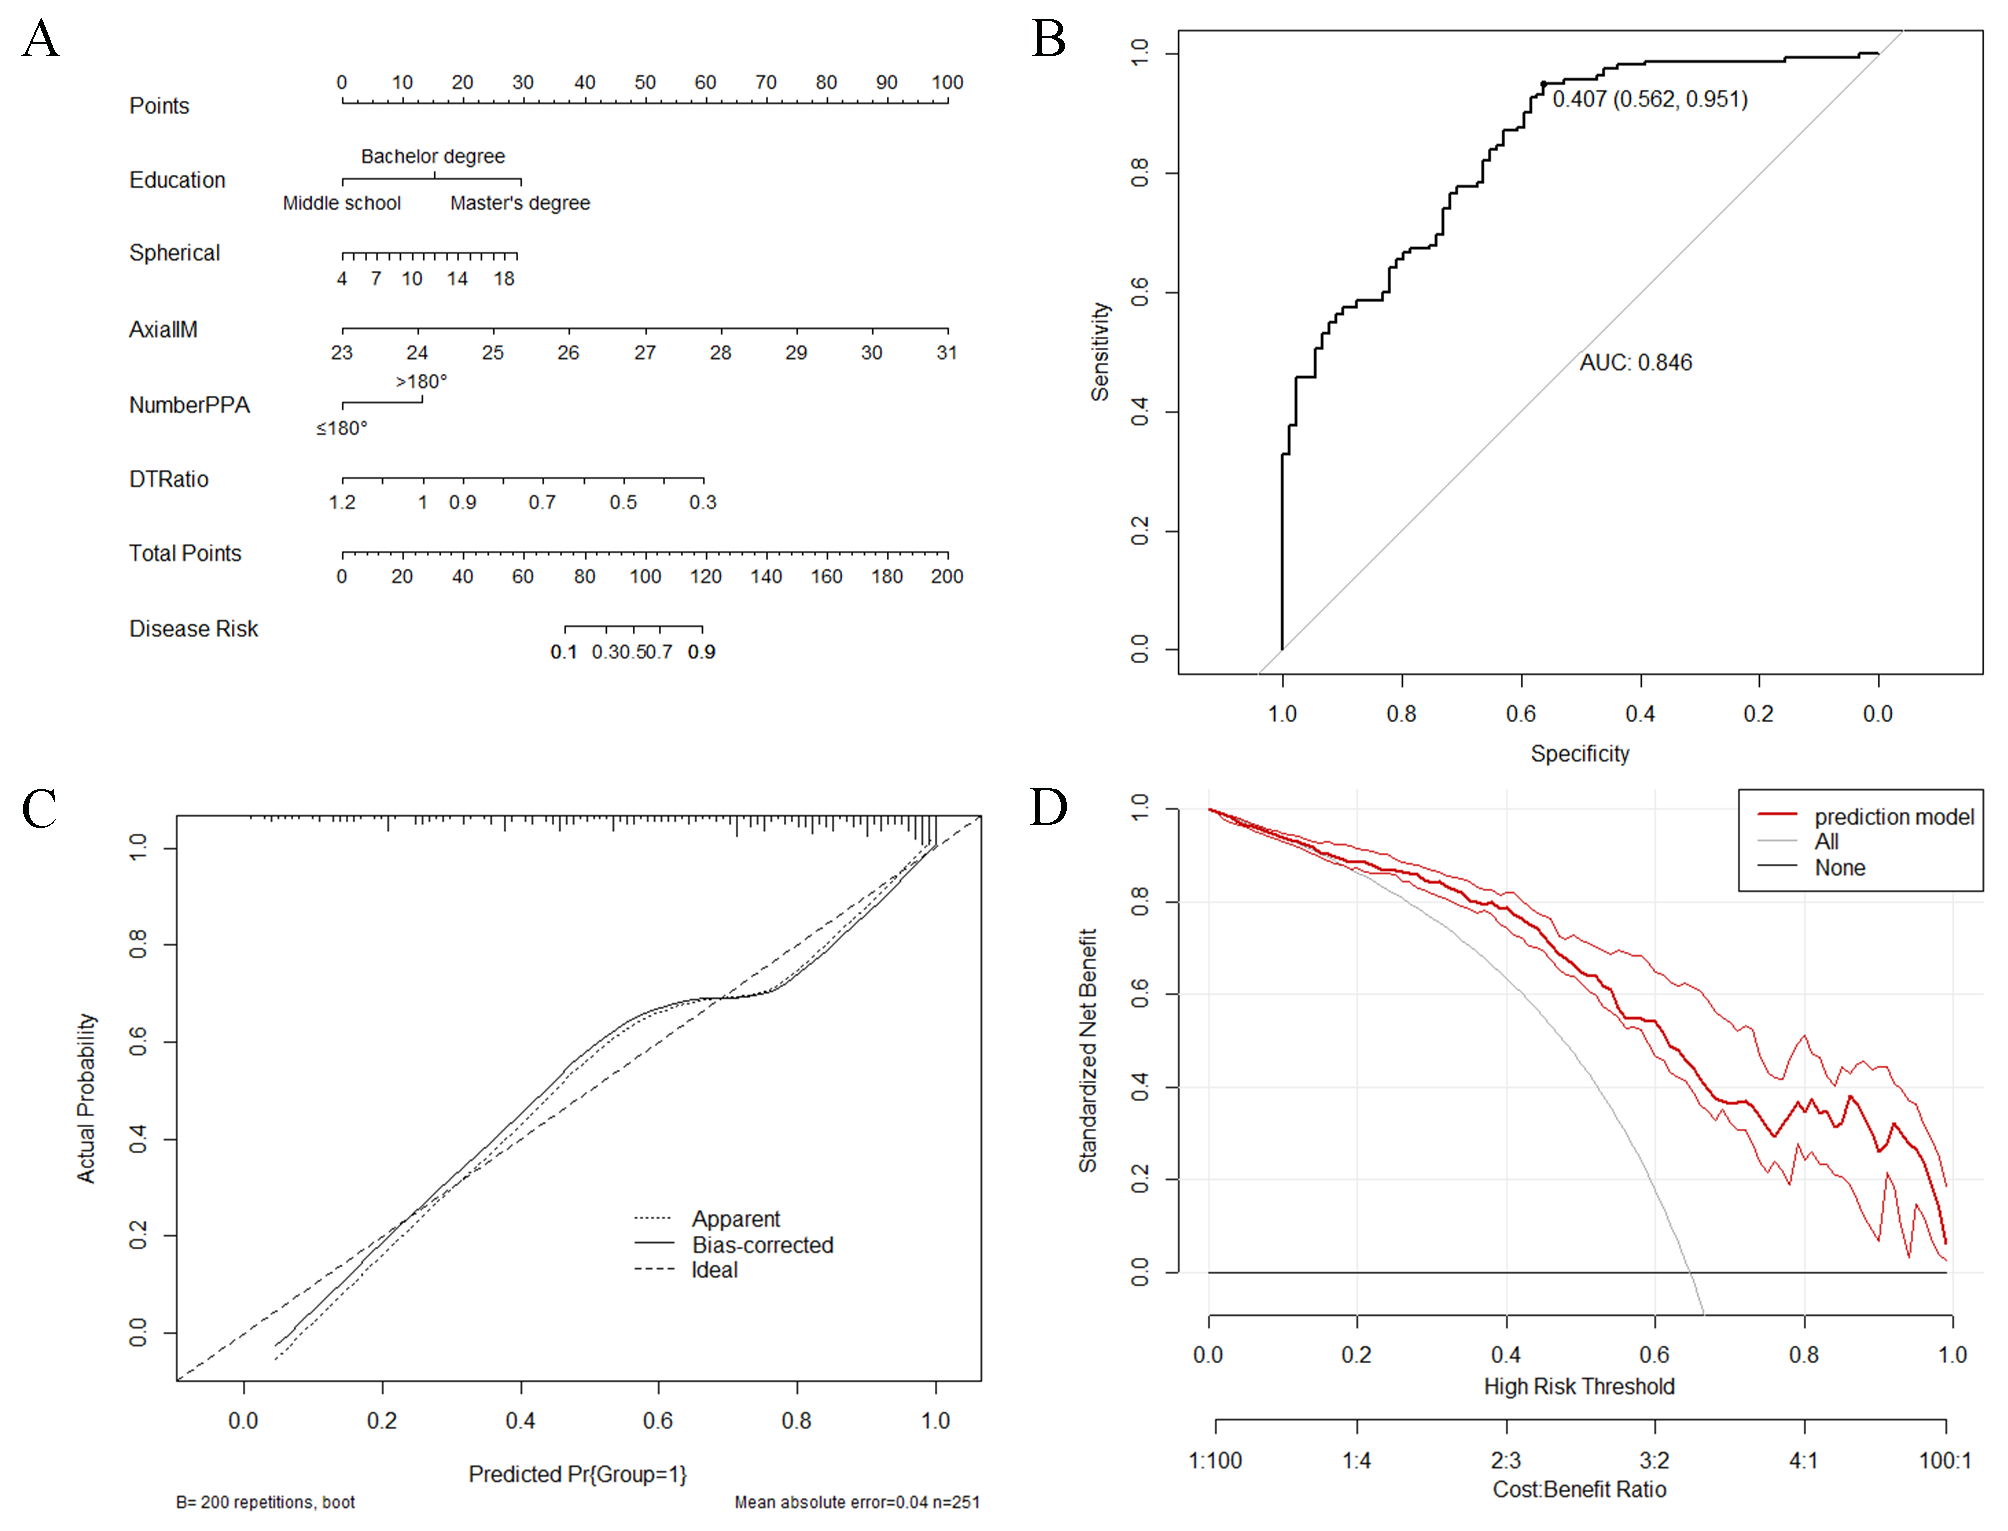
**

**Figure S3**. (A) Diagnostic nomogram for predicting pathologic myopia in patients with tessellated fundus (6:4 split) (Note: Education - education level; Spherical - spherical equivalent (-D); AxialIM - axial length (mm); NumberPPA - extent of peripapillary atrophy; DTRatio - optic disc tilt ratio.); (B) Receiver operating characteristic curve (ROC) of nomogram for predicting pathologic myopia in the training set (6:4 split); (C) Calibration curve of nomogram for predicting pathologic myopia in the training set (6:4 split); (D) Decision curve analysis (DCA) of nomogram for predicting pathologic myopia in the training set (6:4 split)

**
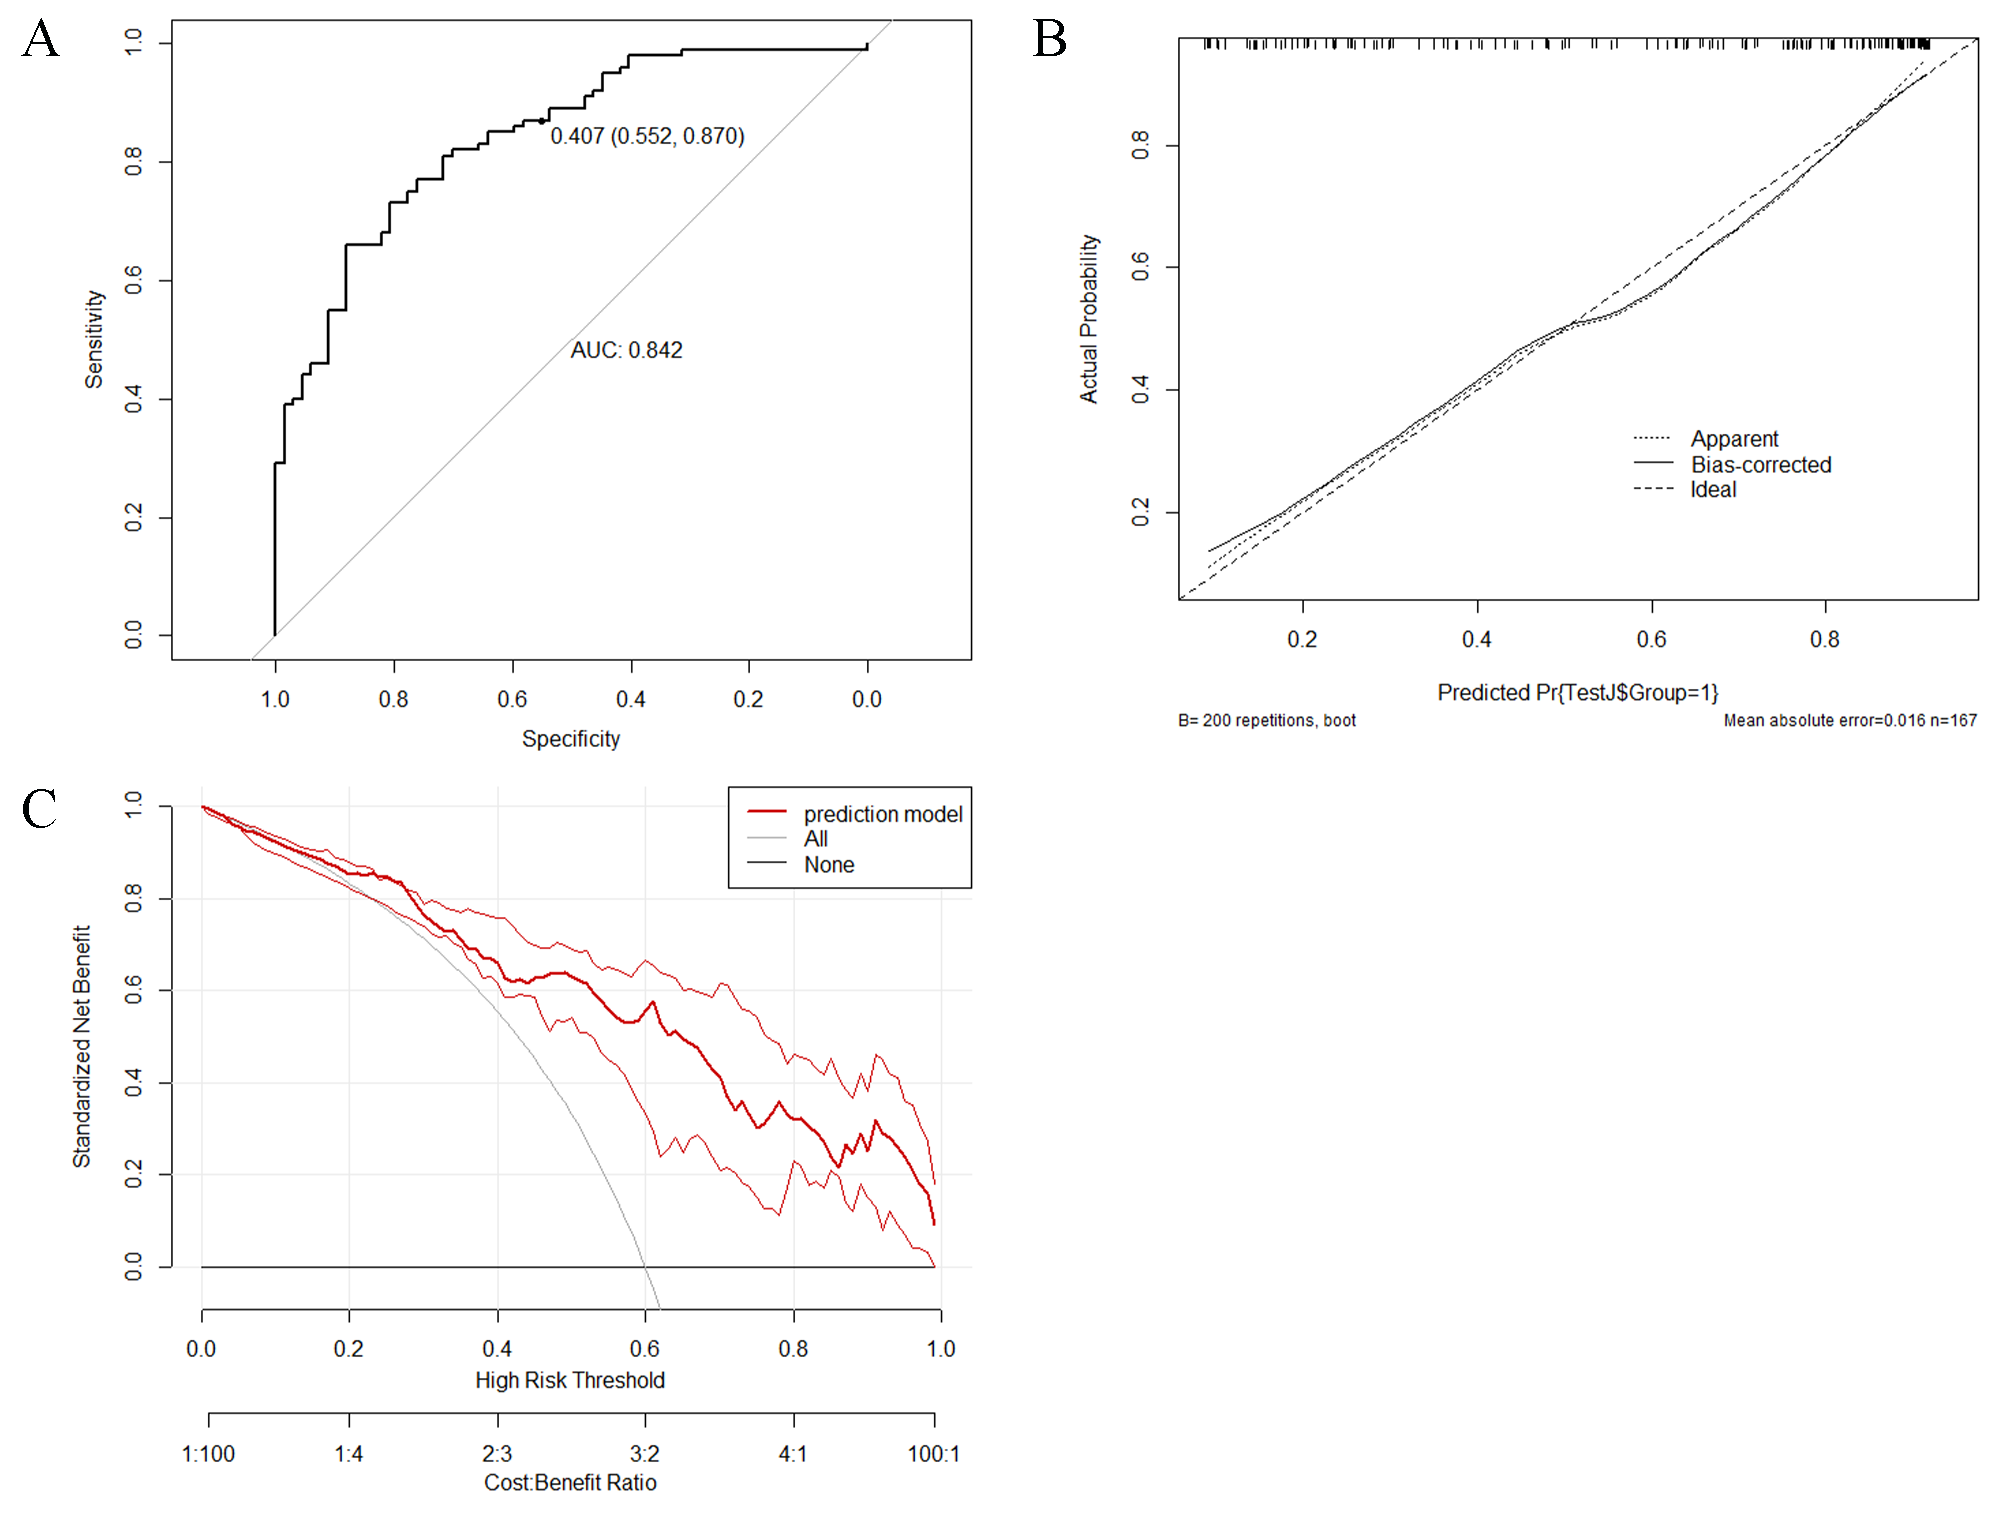
**

**Figure S4**. (A) Receiver operating characteristic curve (ROC) of nomogram for predicting pathologic myopia in the validation set (6:4 split); (B) Calibration curve of nomogram for predicting pathologic myopia in the validation set (6:4 split); (C) Decision curve analysis (DCA) of nomogram for predicting pathologic myopia in the validation set (6:4 split)

**
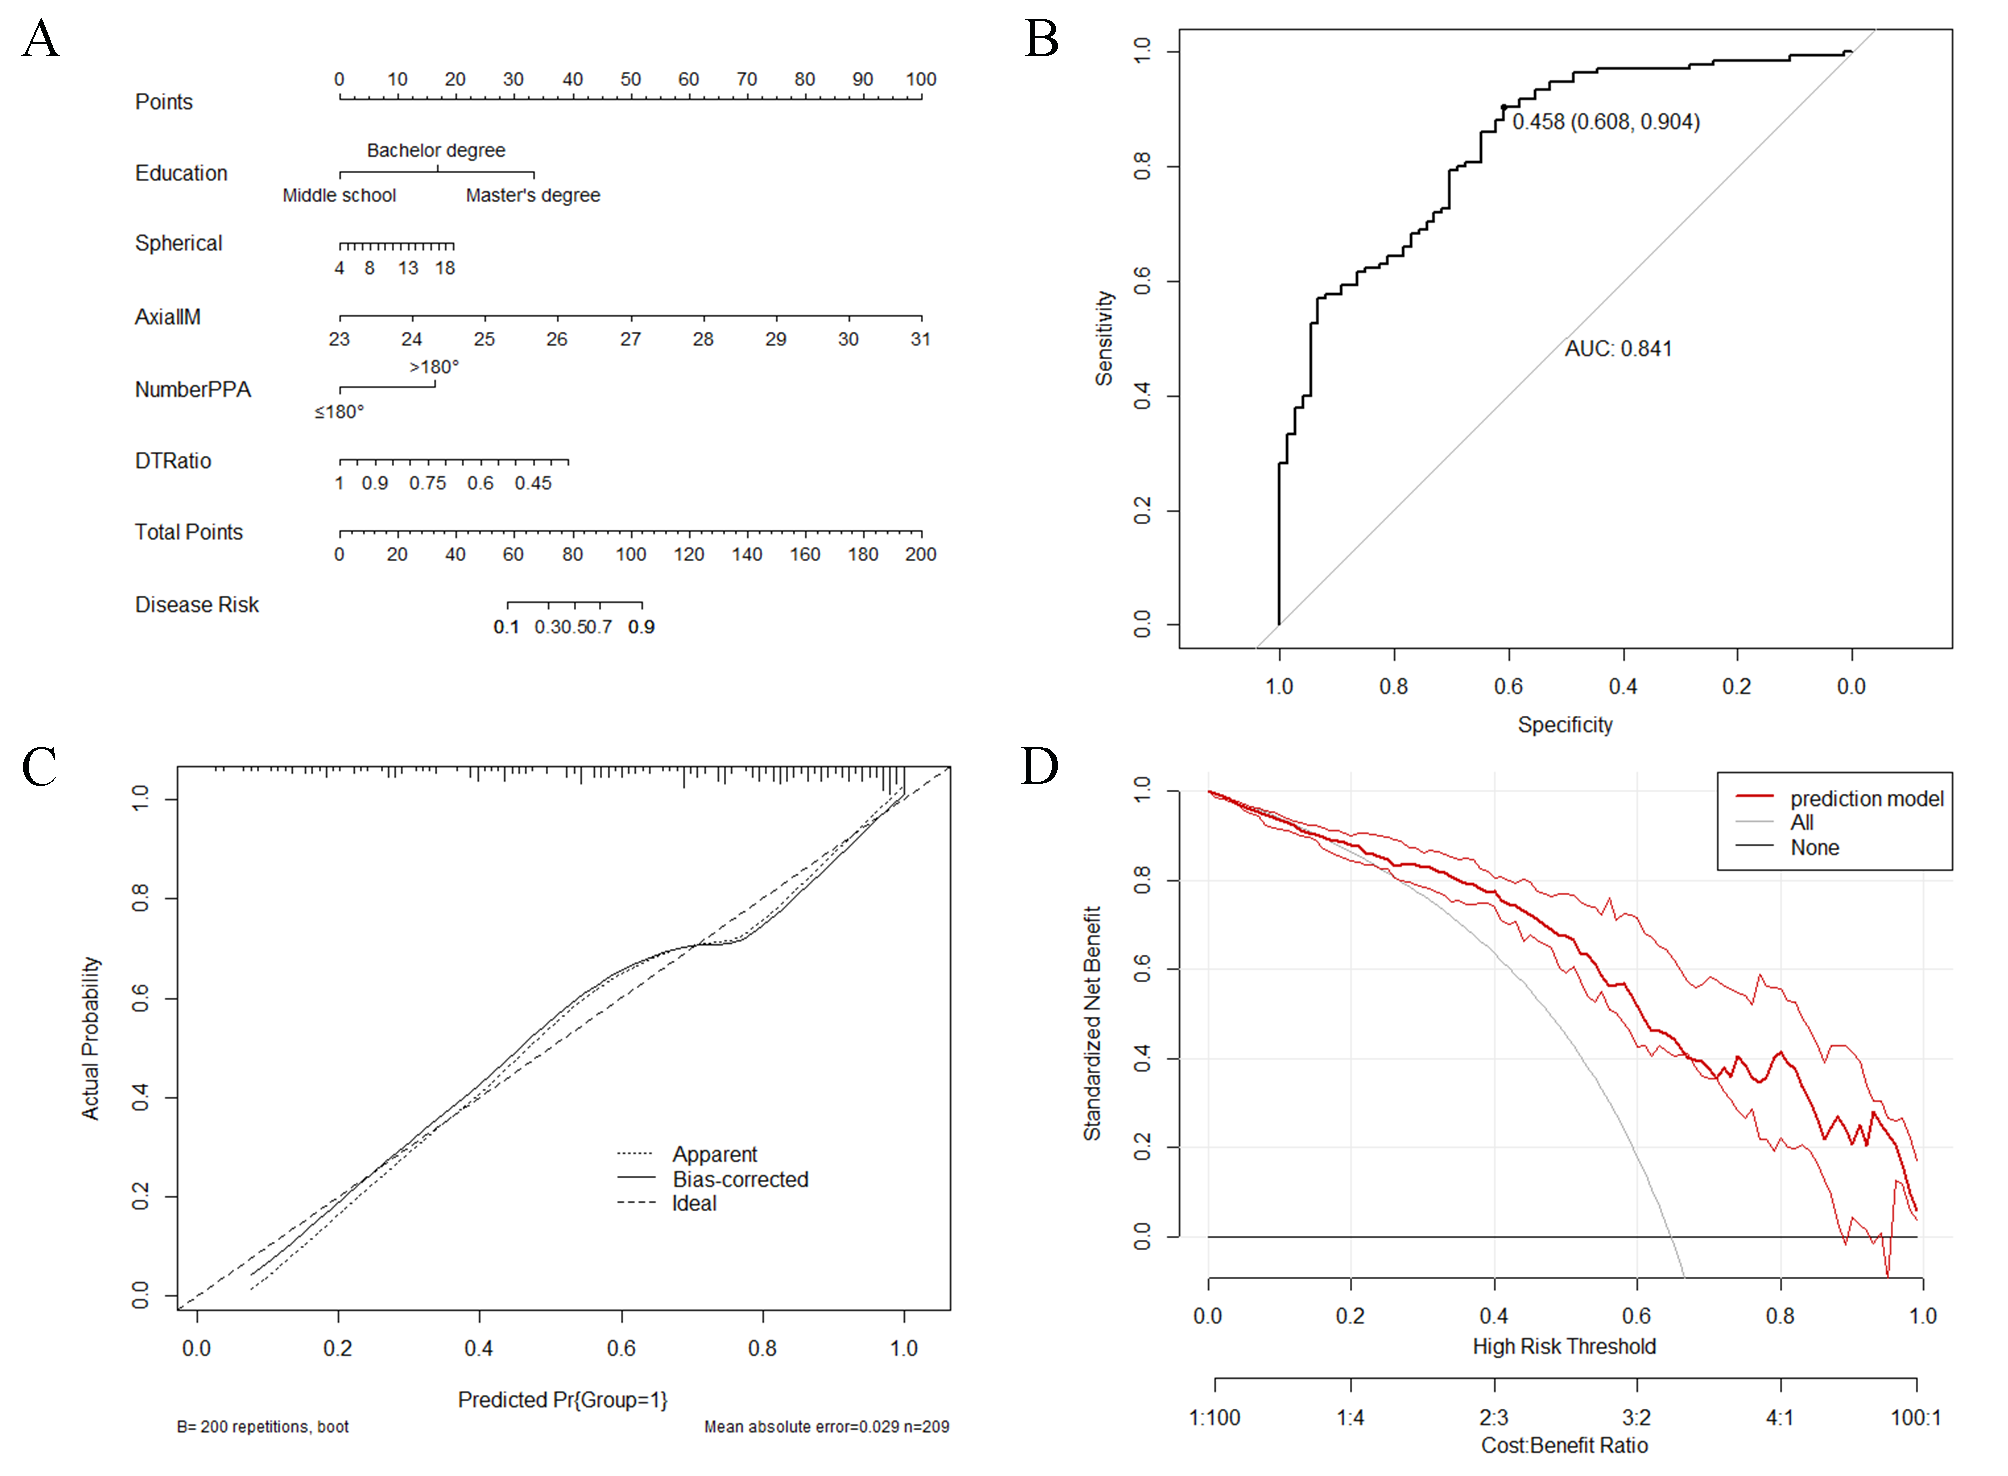
**

**Figure S5**. (A) Diagnostic nomogram for predicting pathologic myopia in patients with tessellated fundus (5:5 split) (Note: Education - education level; Spherical - spherical equivalent (-D); AxialIM - axial length (mm); NumberPPA - extent of peripapillary atrophy; DTRatio - optic disc tilt ratio.); (B) Receiver operating characteristic curve (ROC) of nomogram for predicting pathologic myopia in the training set (5:5 split); (C) Calibration curve of nomogram for predicting pathologic myopia in the training set (5:5 split); (D) Decision curve analysis (DCA) of nomogram for predicting pathologic myopia in the training set (5:5 split)

**
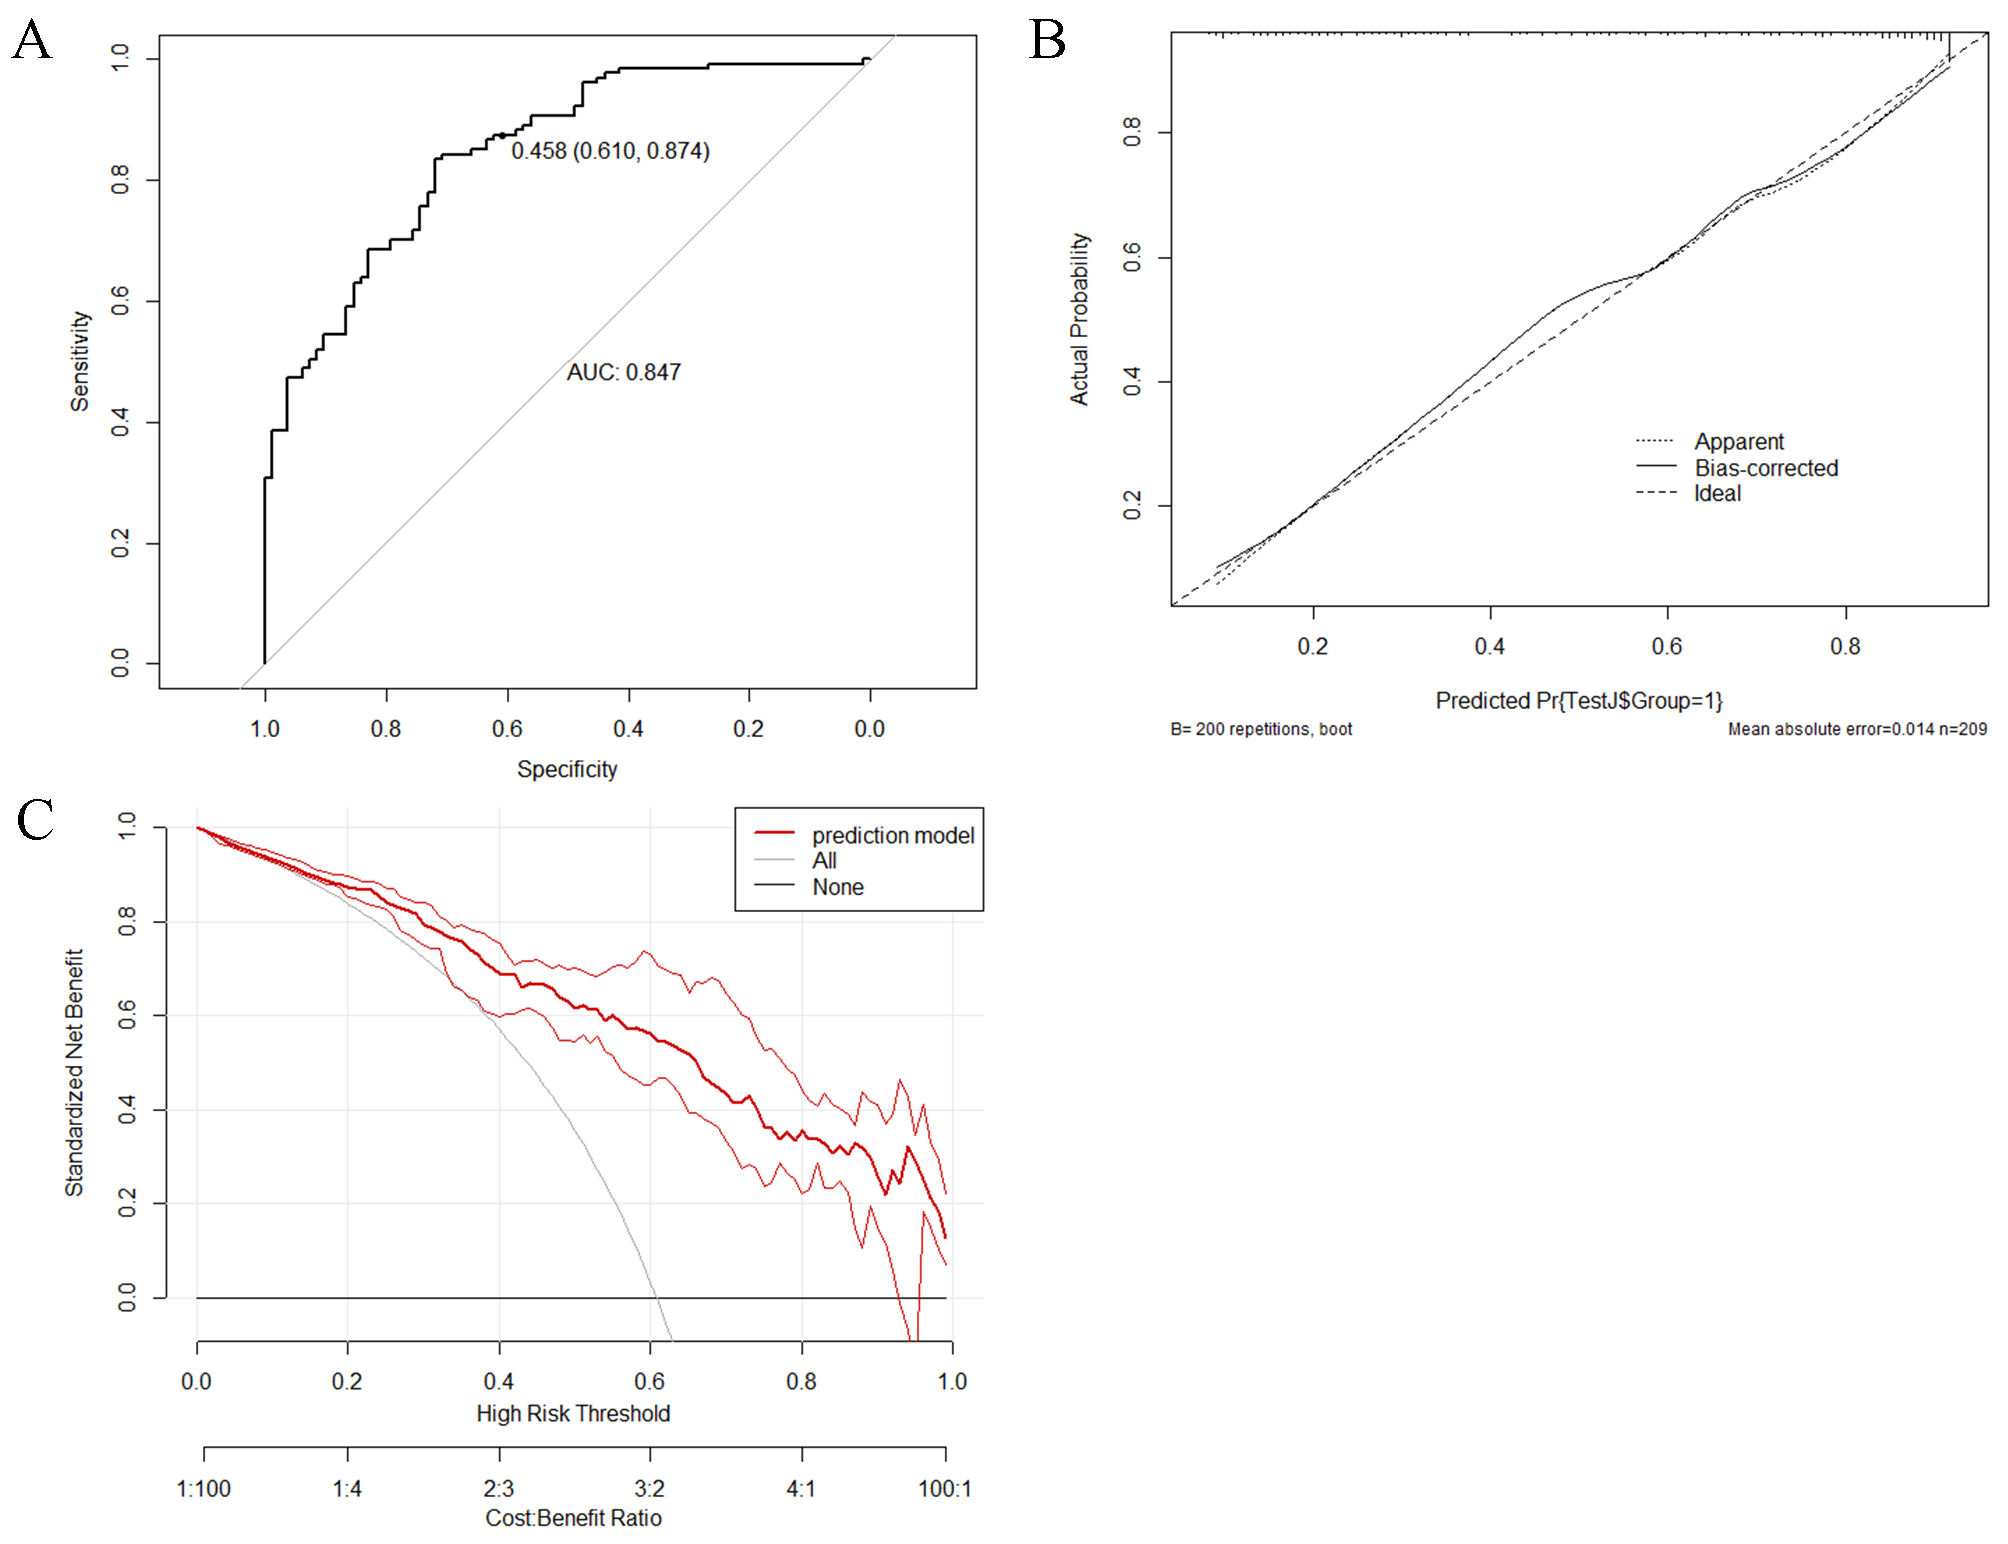
**

**Figure S6**. (A) Receiver operating characteristic curve (ROC) of nomogram for predicting pathologic myopia in the validation set (5:5 split); (B) Calibration curve of nomogram for predicting pathologic myopia in the validation set (5:5 split); (C) Decision curve analysis (DCA) of nomogram for predicting pathologic myopia in the validation set (5:5 split)
